# Supplementary material
Source: publisher figshare collection journal article supplement (https://acs.figshare.com/ndownloader/files/9197806)
Supplement: Supplementary file 1 [file 9197806]

## **Supporting Information**

### **Artificial Synapses with Short- and Long-Term Memory for Spiking Neural Networks Based on Renewable Materials**

*Youngjun Park & Jang-Sik Lee\**

Department of Materials Science and Engineering, Pohang University of Science and  
Technology (POSTECH), Pohang 790–784, Republic of Korea

\*E-mail: jangsik@postech.ac.kr

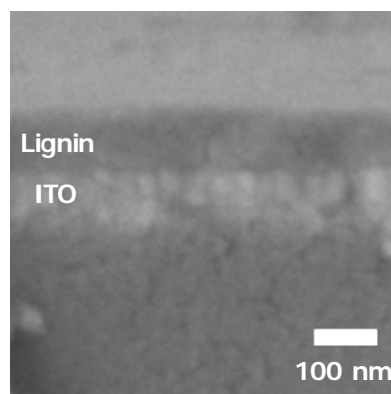

**Figure S1.** Cross-sectional SEM image of lignin thin film on ITO electrode.

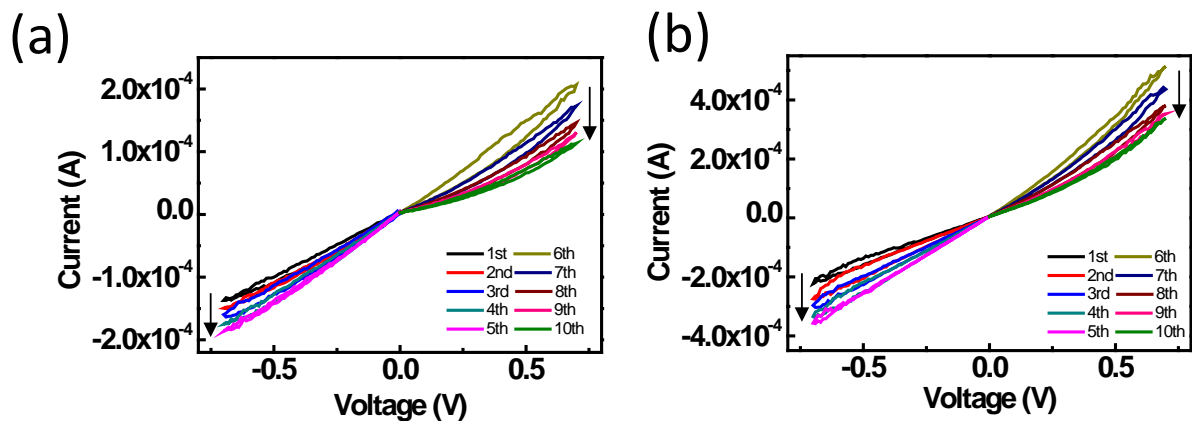

**Figure S2.** I-V characteristics of lignin-based artificial synapse fabricated using different spin coating speeds at (a) 800 rpm and (b) 1000 rpm.

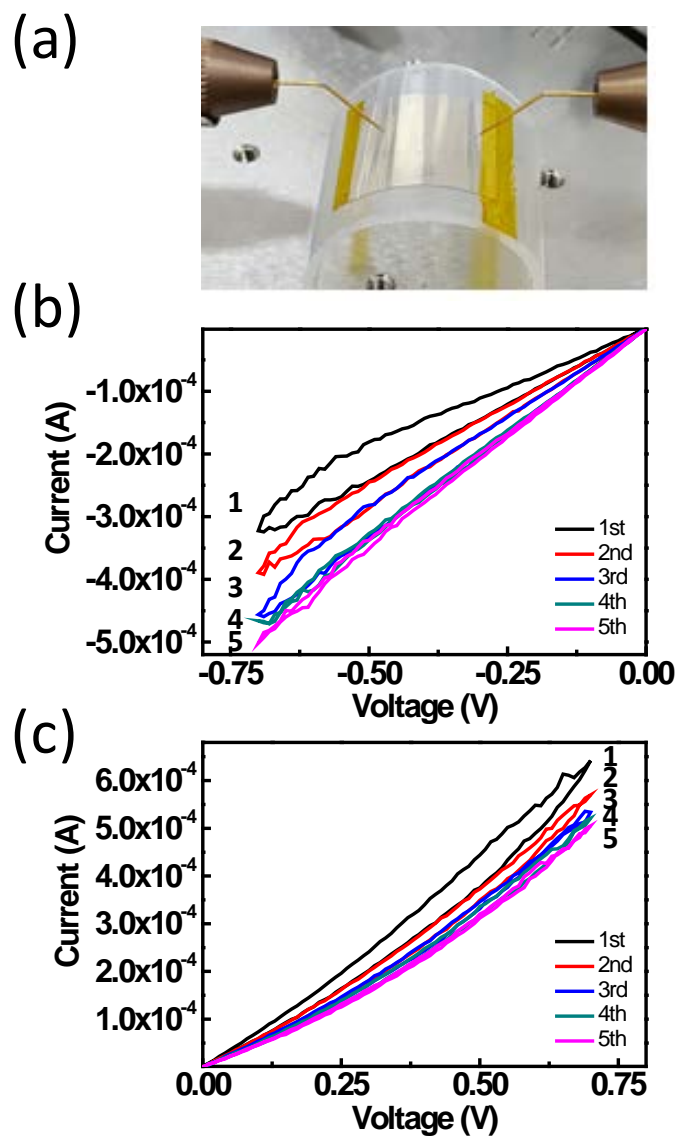

**Figure S3.** Measurement of electrical characteristics under bent state. (a) Photograph image of artificial synapse device. I-V curves of 5 consecutive sweeps at (b) negative and (c) positive directions.

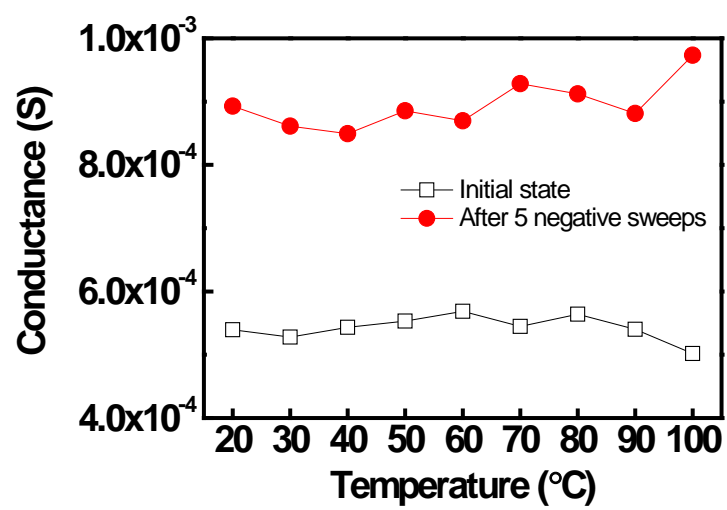

**Figure S4** Temperature stability of lignin-based artificial synapse.

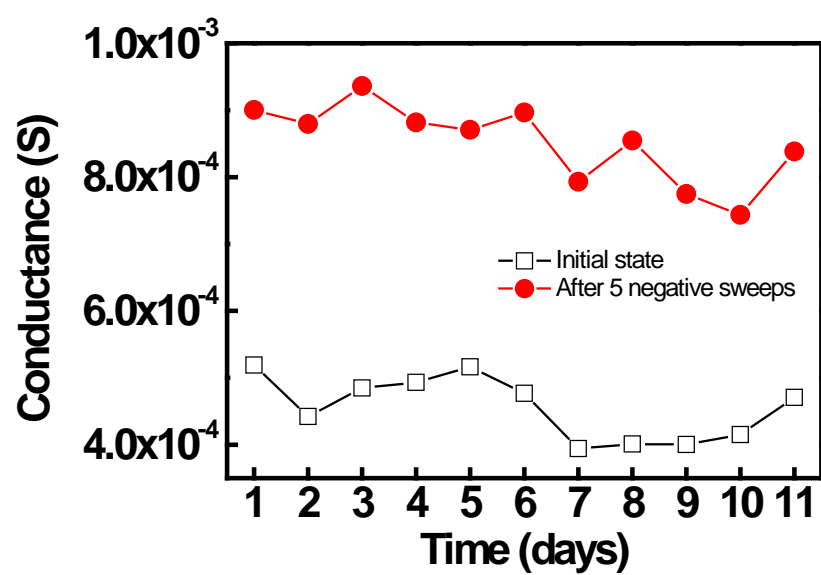

Figure S5. Long-term stability of passivated lignin-based device.

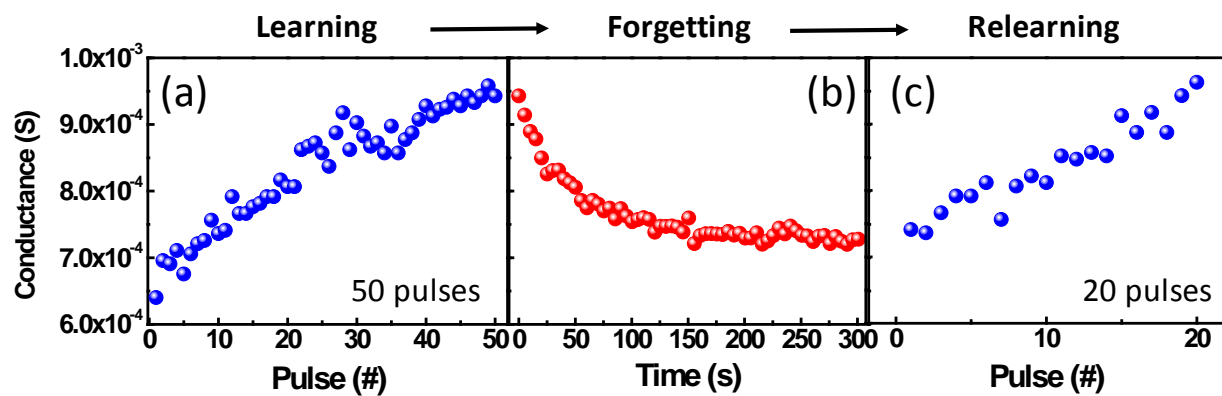

**Figure S6.** Learning experience of the lignin-based device plotted with conductance level. (a) Increase of conductance with 50 consecutive pulses. (b) Spontaneous decay of conductance with time. (c) Increase of conductance with consecutive 20 pulses.

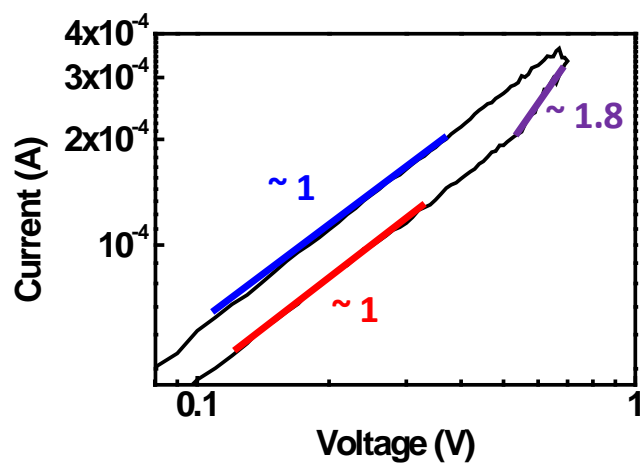

**Figure S7.** Double logarithmic plot of  $I$ - $V$  curve for 1st negative direction sweep.



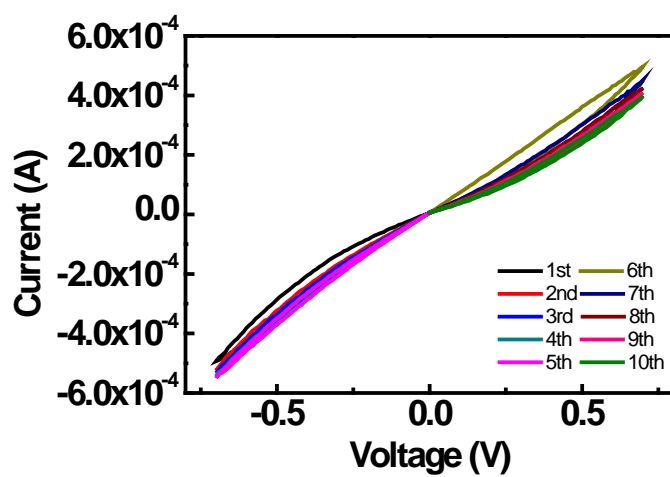

**Figure S8.** *I-V* characteristics of fabricated artificial synapse with Al top electrode.
